# Supplementary material
Source: publisher figshare collection journal article supplement (https://tandf.figshare.com/ndownloader/files/17682413)
Supplement: Supplementary file 1 [file 17682413]

**Supplementary materials**

(1)

(2)

**Fig. 1** Gas chromatogram of the furniture: (1) footstool; (2) bedside table
